# Supplementary material for: Synchrotron X-ray tomographic quantification of microstructural evolution in ice cream – a multi-phase soft solid
Source: Royal Society of Chemistry journal article supplement (doi:10.1039/c7ra00642j), 2017-01-01
Supplement: c7ra00642j1.pdf [file c7ra00642j1.pdf]

## Supplementary Material

### Synchrotron X-ray tomographic quantification of microstructural evolution in ice cream - a multi-phase soft solid

Authors: Enyu Guo <sup>a,b,\*\*</sup>, Guang Zeng <sup>a,b</sup>, Daniil Kazantsev <sup>a,b</sup>, Peter Rockett <sup>a</sup>, Julian Bent <sup>c</sup>, Mark Kirkland <sup>c</sup>, Gerard Van Dalen <sup>c</sup>, David S Eastwood <sup>a,b</sup>, David StJohn <sup>d</sup>, Peter D Lee <sup>a,b,\*</sup>

<sup>a</sup> School of Materials, The University of Manchester, Manchester, M13 9PL, U. K

<sup>b</sup> Research Complex at Harwell, RAL, Didcot, OX11 0FA, U. K

<sup>c</sup> Unilever R&D, Colworth, MK44 1LQ, U. K

<sup>d</sup> School of Mechanical and Mining Engineering, The University of Queensland, St Lucia, Queensland, 4072, Australia

\*,\*\*Corresponding authors:

\*Peter D Lee: [peter.lee@manchester.ac.uk](mailto:peter.lee@manchester.ac.uk); Tel: +44 (0)1235 567789 or 7701

\*\*Enyu Guo: [enyu.guo@manchester.ac.uk](mailto:enyu.guo@manchester.ac.uk); Tel: +44 (0)1235 567886

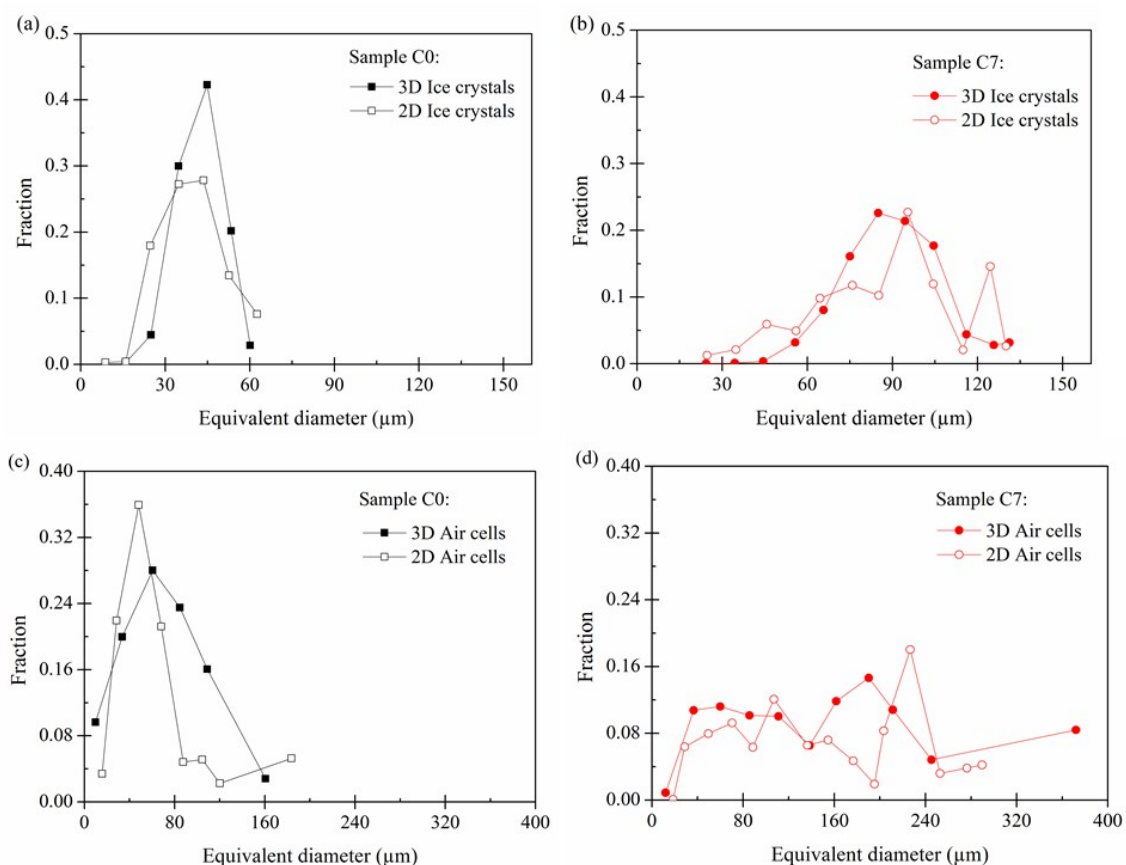

Supplementary Fig. 1. Comparison of the size distributions as measured by 2D cryo-SEM and 3D tomography for: (a, b) the ice crystals; and (c, d) air cells.
